# 1 **Virion-associated spermidine transmits with Rift Valley fever virus** 2 **particles to maintain infectivity**

3

4 Vincent Mastrodomenico<sup>1</sup>, Jeremy J. Esin<sup>1,2</sup>, Shefah Qazi<sup>3</sup>, Oreoluwa S. Omoba<sup>1,2</sup>, Brittany L.  
5 Fung<sup>1</sup>, Maxim A. Khomutov<sup>4</sup>, Alexander V. Ivanov<sup>4</sup>, Suchetana Mukhopadhyay<sup>3</sup>, Bryan C.  
6 Mounce<sup>1,2\*</sup>

7

8 <sup>1</sup>Department of Microbiology and Immunology, Stritch School of Medicine, Loyola University  
9 Chicago, Maywood, IL 60153 USA.

10 <sup>2</sup>Infectious Disease and Immunology Research Institute, Stritch School of Medicine, Loyola  
11 University Chicago, Maywood, Illinois, USA

12 <sup>3</sup>Department of Biology, Indiana University, Bloomington, Indiana, USA

13 <sup>4</sup>Engelhardt Institute of Molecular Biology, Russian Academy of Sciences, Moscow, Russia

14 \* To whom correspondence should be addressed:

15 Department of Microbiology and Immunology  
16 Loyola University Chicago, Stritch School of Medicine  
17 2160 S. First Ave.  
18 Maywood, IL 60153  
19 708 216 3358, [bmounce@luc.edu](mailto:bmounce@luc.edu)

20

21 **Short Title:** Rift Valley fever virions associate with spermidine

22 **Keywords:** bunyaviruses, spermidine, polyamines, virus infectivity

23

## 24 **Abstract**

25 Viruses require host cell metabolites to productively infect, and the mechanisms by which  
26 viruses usurp these molecules is diverse. One group of cellular metabolites important in virus  
27 infection is the polyamines, small positively-charged molecules involved in cell cycle, translation,  
28 and nucleic acid synthesis, among other cellular functions. Polyamines also support replication  
29 of diverse viruses, and they are important for processes such as transcription, translation, and  
30 viral protein enzymatic activity. Rift Valley fever virus (RVFV) is a negative-sense RNA virus that  
31 requires polyamines to produce infectious particles. In polyamine depleted conditions,  
32 noninfectious particles are produced that interfere with virus replication and stimulate immune  
33 signaling. Here, we find that RVFV relies on virion-associated polyamines to maintain infectivity.

Mastrodomenico *et al.*

34 We show that RVFV replication is facilitated by any of the three biogenic polyamines; however,  
35 we specifically find spermidine associated with purified virions. Using a panel of polyamine  
36 homologs, we observe that virions can also associate with (*R*)-3-methylspermidine and  
37 norspermidine, though not with other less homologous molecules. Using polyamine reporter  
38 cells, we demonstrate that virion-associated polyamines transmit from one infected cell to  
39 another. Finally, we find that virions devoid of polyamines are unstable and cannot be  
40 supplemented with exogenous polyamines to regain stability or infectivity. These data highlight  
41 a unique role for polyamines, and spermidine in particular, in maintaining virus infectivity, a  
42 function not previously appreciated. Further, these studies are the first to identify polyamines  
43 associated with RVFV virions. Targeting polyamines represents a promising antiviral strategy,  
44 and this work highlights a new mechanism by which we can inhibit virus replication through  
45 FDA-approved polyamine depleting pharmaceuticals.

46

## 47 **Introduction**

48 Rift Valley fever virus (RVFV) is a significant human and ruminant pathogen, associated with  
49 hemorrhagic fever and spontaneous abortion. While the virus is currently geographically  
50 restricted to Africa and the Middle East, the potential for spread globally is significant. Further,  
51 RVFV is a mosquito-borne virus, and chikungunya<sup>1</sup> and Zika<sup>2</sup> virus demonstrate that these  
52 viruses can spread globally and explosively. Both *Culex* and *Aedes* species of mosquitoes  
53 transmit RVFV<sup>3-5</sup>, though the breadth of vectors susceptible to RVFV is not fully understood.  
54 Fortunately, several vaccine candidates<sup>6-8</sup> show promise in reducing transmission, including in  
55 animals. However, adverse events associated with these vaccines have limited their use, and  
56 the virus continues to present itself in frequent outbreaks<sup>9-11</sup>, infecting hundreds and severely  
57 impacting local economies. Thus, the development of improved vaccines or the identification of  
58 novel antiviral targets is essential to the treatment and prevention of RVFV.

59

60 As obligate intracellular pathogens, viruses rely on their host cells for the building blocks of  
61 replication. These building blocks include a variety of metabolites produced by the host cell.  
62 One set of these metabolites crucial to virus replication is the family of polyamines. Eukaryotic  
63 cells synthesize polyamines to support transcription, translation, and cell cycling<sup>12-14</sup>. The  
64 biogenic polyamines include putrescine, spermidine, and spermine, which are maintained at  
65 millimolar level within cells<sup>15</sup> and readily interconvert within cells<sup>16</sup>. These molecules are carbon  
66 chains of increasing length with primary and secondary amine groups. At physiological pH,  
67 polyamines are positively charged, which facilitates nucleic acid interactions. In fact, upwards of

Mastrodomenico *et al.*

68 85% of polyamines are bound to nucleic acids (primarily RNA), proteins, or lipids to support  
69 cellular functions<sup>17</sup>. However, polyamines are dispensable for cellular homeostasis in non-  
70 transformed cells. Depletion of polyamines via the specific inhibitor difluoromethylornithine  
71 (DFMO) reduces cellular proliferation but is otherwise nontoxic<sup>18</sup>. In humans, chronic DFMO  
72 treatment has mild side effects and is used in the treatment of trypanosomiasis<sup>19,20</sup>. Additionally,  
73 diethylnorspermidine (DENSpm) is a nontoxic molecule that enhances polyamine catabolism by  
74 acetylating polyamines and promoting their export or degradation. Thus, while polyamines are  
75 crucial to cellular replication, organismal polyamine depletion is tolerable.

76

77 Early work demonstrated that a subset of viruses incorporate polyamines in virions, especially  
78 large DNA viruses like herpesviruses and vaccinia virus, which use polyamines to package their  
79 large dsDNA genomes<sup>21-23</sup>. In contrast, RNA viruses, with relatively smaller single-stranded  
80 genomes were poorly studied in the context of polyamine metabolism. Polyamines facilitate  
81 RNA virus replication, and the polyamine inhibitor DFMO reduces the replication of diverse RNA  
82 viruses, including alphaviruses, flaviviruses, enteroviruses, and bunyaviruses, both *in vitro* and  
83 *in vivo*<sup>24,25</sup>. Chikungunya and Zika viruses (CHIKV and ZIKV) rely on polyamines for genome  
84 replication and viral polyprotein translation<sup>24</sup>. Additionally, we have shown that polyamines  
85 enhance viral protease activity<sup>26</sup>, promote infectious particle production<sup>27</sup>, and support virus-cell  
86 binding<sup>28</sup> in enteroviruses and bunyaviruses. The breadth of mechanisms by which polyamines  
87 support virus infection remain unknown but recent evidence suggests that different viruses  
88 utilize polyamines via different mechanisms.

89

90 The distinct structures of polyamines have different roles in cells and in viruses. For instance,  
91 spermidine copurifies with *E.coli* tRNAs<sup>29</sup> and each biogenic polyamine has a distinct affinity for  
92 tRNA<sup>30</sup>. Spermidine is also used specifically in the genesis of the modified amino acid hypusine,  
93 which is important for translation<sup>31,32</sup> and also crucial in the replication of some viruses<sup>33,34</sup>.  
94 Herpesviruses preferentially package spermidine and spermine but not putrescine in their  
95 virions<sup>21</sup>, though it is unknown why these polyamines are preferred. In contrast, chikungunya  
96 virus polymerase is stimulated by polyamines and was equally stimulated by putrescine,  
97 spermidine, or spermine<sup>24</sup>, suggesting that some viral processes may be insensitive to  
98 polyamine identity. Similarly, phage T7 polymerase is stimulated by spermidine and a variety of  
99 polyamines not synthesized in eukaryotic or prokaryotic cells<sup>13</sup>.

100

Mastrodomenico *et al.*

101 Polyamines are crucial to RVFV infection, and we demonstrated that polyamine depletion  
102 reduces RVFV titers and leads to the production of noninfectious particles that interfere with  
103 virus replication<sup>27</sup>. Precisely how polyamines function<sup>27</sup> in RVFV infection remains unclear,  
104 however. Here, we investigated whether RVFV relied on specific polyamines for replication. We  
105 observe that RVFV replication is supported by any of the biogenic polyamines as well as  
106 cadaverine and norspermidine, two bacterially-synthesized polyamines. We find that these  
107 polyamines support infectious particle production. We considered that polyamines may be  
108 associated with RVFV virions and measured them via fluorometric assay and thin layer  
109 chromatography. We identify spermidine within purified virions and that single-carbon  
110 modifications of spermidine can also associate with virions. We finally show that virion-  
111 associated spermidine enhances viral particle infectivity and that exogenous polyamines applied  
112 to virions cannot restore their infectivity. In sum, polyamines, spermidine in particular, are crucial  
113 to RVFV due to their association with the virion which maintains infectivity.

114

## 115 **Results**

### 116 **Rift Valley fever virus is sensitive to low concentrations of biogenic polyamines.**

117 Bunyaviruses are sensitive to polyamine depletion mediated either by DFMO or DENSp<sub>m</sub>, and  
118 replenishing polyamines exogenously fully rescues replication. To determine if specific  
119 polyamines enhance virus replication, we depleted Huh7 cells of polyamines using 1 mM  
120 DFMO, infected at multiplicity of infection (MOI) of 0.1 plaque-forming units (pfu) per cell with  
121 RVFV strain MP-12 and then titrated the biogenic polyamines putrescine, spermidine, and  
122 spermine at the time of infection. After 48h, virus was collected and titered by plaque assay on  
123 Vero-E6 cells. We observed that DFMO significantly reduced viral titers compared to untreated  
124 samples, not supplemented with DFMO or exogenous polyamines (Figure 1, dashed line  
125 “DFMO” versus not treated, or “NT”). We further observed that viral titers remained suppressed  
126 until polyamine concentration passed 1  $\mu$ M, which held for each of putrescine, spermidine and  
127 spermine (Figure 1A). We observed EC<sub>50</sub> values of 3.6, 4.6, and 9.9  $\mu$ M for spermine,  
128 spermidine, and putrescine, respectively. In fact, each polyamine rescued viral titers to levels  
129 that were not significantly different from untreated samples at 10  $\mu$ M. We performed a similar  
130 analysis with distantly-related bunyavirus La Crosse virus (LACV) and observed similar results:  
131 all three biogenic polyamines supported infection in the micro-molar range (Figure 1B) and no  
132 polyamine was favored when supplemented to DFMO-treated cells.

133

Mastrodomenico *et al.*

134 **Polyamines not synthesized in eukaryotes also support viral replication.** The biogenic  
135 polyamines are found in all eukaryotic cells examined. Given the relatively simple structure of  
136 polyamines, consisting of carbon chains with primary and secondary amines, we hypothesized  
137 that additional non-biogenic molecules with similar structures may also enhance virus  
138 replication. To test this, we treated Huh7 cells with 1 mM DFMO, infected with RVFV, and  
139 supplemented cells with an array of polyamines at 10  $\mu$ M at the time of infection (a selection of  
140 structures shown in Figure 1C. All polyamines except putrescine, spermidine, and spermine are  
141 not synthesized in eukaryotic cells and are non-biogenic). When we measured viral titers at 48  
142 hpi, we observed that biogenic polyamines fully rescued viral titers; however, we also observed  
143 that the polyamines cadaverine (1,4-diaminopentane, one carbon longer than putrescine) and  
144 norspermidine (one fewer carbon than spermidine), two polyamines not synthesized by  
145 eukaryotic cells, rescued viral titers to nearly equivalent levels as the biogenic polyamines  
146 (Figure 1D). Interestingly, we observed that no other non-biogenic polyamines enhanced titers  
147 beyond DFMO treatment levels, despite their structural similarity. Of particular interest,  
148 butylamine, which is similar to putrescine but lacks an amino group, failed to enhance  
149 replication. Additionally, elongating the putrescine carbon chain to six (diaminohexane) or seven  
150 (diaminoheptane) carbons or shortening the chain to three carbons also eliminated  
151 enhancement of virus replication. Again, we tested this set of polyamines with LACV and  
152 observed that cadaverine and norspermidine again enhanced viral titers, while all other  
153 compounds did not, suggesting conservation in polyamine usage between these two  
154 bunyaviruses (Figure 1E).

155  
156 Finally, we used an enterovirus model of infection, Coxsackievirus B3 (CVB3) to test its  
157 sensitivity to distinct polyamines. As with RVFV and LACV, we treated cells with DFMO and  
158 supplemented with polyamines at the time of infection. When we titrated the three biogenic  
159 polyamines, we observed enhancement of replication at 1  $\mu$ M of either putrescine, spermidine,  
160 or spermine (Figure 1F), similar to RVFV and LACV. We also tested whether CVB3 could utilize  
161 cadaverine or norspermidine for replication. When we supplemented DFMO-treated cells with  
162 either of these compounds, however, neither cadaverine nor norspermidine enhanced  
163 replication (Figure 1G). These data suggest that distinct virus families may rely on distinct  
164 polyamine structures for optimal replication.

165  
166 **Polyamines maintain RVFV specific infectivity.** We previously demonstrated that polyamine  
167 depletion limits virus replication via the generation of noninfectious particles. To test whether the

Mastrodomenico *et al.*

168 biogenic polyamines also maintain specific infectivity of RVFV, we measured the ratio of  
169 genomes to infectious virus, as measured by plaque assay. We treated Huh7 cells with 1 mM  
170 DFMO prior to infection at MOI 0.1. At the time of infection, we added 100  $\mu$ M putrescine,  
171 spermidine, or spermine. After 48 h, supernatant was collected for titration and RNA purification.  
172 RNA was reverse transcribed and analyzed for RVFV genomes using virus-specific primers. We  
173 then calculated the genome-to-PFU ratio as a measure of specific infectivity. Similar to our  
174 previous work, polyamine depletion increased the ratio of genomes to PFU (Figure 2A),  
175 suggesting reduced specific infectivity. However, addition of putrescine or spermine returned  
176 this ratio to untreated levels and modestly increased specific infectivity (fewer genomes per  
177 PFU) with spermidine treatment. We performed a similar analysis for LACV and observed the  
178 same phenotype: DFMO treatment increases the genome-to-PFU ratios, while the biogenic  
179 polyamines reduce to untreated levels (Figure 2B).

180

181 Measuring genome-to-PFU is a surrogate for measuring the number of viral particles compared  
182 to the number of these particles that are infectious. To more accurately measure particle-to-PFU  
183 ratio, we used a method similar to Wichgers Schreur and colleagues to stain viral particles  
184 fluorescently<sup>35</sup>. We spinoculated virus on coverslips and stained for viral envelope glycoprotein  
185 Gc or Gn using specific antibodies and FITC-tagged fluorescent secondary antibody. To  
186 establish the assay, we tested both antibodies to ensure specificity and that we weren't  
187 observing aberrations due to impurities on the coverslips or nonspecific staining. Using  
188 spinoculated virus derived from infected and uninfected cells, we observed dots corresponding  
189 to virus in only samples that were infected, no detectable signal was observed on slides  
190 spinoculated with samples from uninfected cells (Figure 2C). We next applied this method to  
191 virus derived from DFMO-treated cells as well as cells supplemented with various polyamines.  
192 Again, virus was spinoculated from mock- or virus-infected cell supernatant and stained with  
193 anti-Gn and FITC-tagged secondary. As a control, we also stained with a secondary antibody  
194 fluorescent in the red channel (TxRed). When we visualized the samples, we observed distinct  
195 puncta only in infected samples and not in mock samples (Figure 2D). We also observed no  
196 staining in the red channel, suggesting that we were again not observing impurities on the  
197 coverslips (Figure 2D, "Red channel"). We counted the number of dots using ImageJ and back-  
198 calculated the number of particles per mL of infected cell supernatant (Figure 2E). We used this  
199 number to calculate the particle-to-PFU ratio (Figure 2F). Supporting our genome-to-PFU  
200 ratios, we observed that untreated cells had a particle-to-PFU ratio of approximately 20, and  
201 DFMO-mediated polyamine depletion increased this to >300. Thus, DFMO treatment increases

Mastrodomenico *et al.*

202 the genome-to-PFU ratio, as well as the particle-to-PFU ratio, as measured by our two methods.  
203 To expand our rescue experiments, we similarly stained particles derived from infection of  
204 DFMO-treated and polyamine-supplemented cells. As with our genome-to-PFU ratio, we  
205 observe that addition of any of the biogenic polyamines returns the particle-to-PFU ratio to  
206 untreated levels, with a small, though significant, reduction in this ratio, suggesting that  
207 polyamines support RVFV infectivity.

208

209 **Polyamines are associated with the RVFV virion.** We observe a change in specific infectivity  
210 (as measured by genome-to-PFU or particle-to-PFU), and we previously characterized that the  
211 physical and structural properties of virions produced with or without polyamines are  
212 indistinguishable. We next considered that polyamines might be associated with RVFV virions  
213 themselves. In fact, polyamines are found in the virions of several DNA viruses and a subset of  
214 RNA viruses. To this end, we used a fluorometric assay, which directly measures polyamine  
215 content in cells. We generated virus in Huh7 cells left untreated or treated with 1 mM DFMO by  
216 infecting at MOI 0.1 for 48 h. After 48 h, we purified virus by sucrose cushion ultracentrifugation,  
217 resuspended the viral pellet in PBS, and analyzed polyamine association. As a control, we used  
218 mock-infected supernatant and performed all steps in tandem with virus-infected cell  
219 supernatant. As expected, our purified mock-infected supernatant had no signal (Figure 3A).  
220 Similarly, CVB3-infected cell supernatant exhibited no detectable signal above background, as  
221 expected<sup>23</sup>. As a positive control<sup>22</sup>, we observed detectable levels of polyamines in purified  
222 vaccinia virus (VACV), and this signal returned to background levels when virus was derived  
223 from DFMO-treated conditions. When we tested RVFV, we observed signal above background,  
224 though not as intense as VACV, and this signal was depleted when virus was derived from  
225 DFMO-treated cells. These results suggest that purified RVFV virions are associated with  
226 polyamines.

227

228 Importantly, the fluorescent polyamine assay does not distinguish between polyamines in the  
229 cell; thus, this assay could not dictate which specific polyamine is associated with virions. In  
230 order to identify the polyamine(s), we purified and concentrated RVFV from Huh7 cells  
231 (approximately 10<sup>6</sup> PFU total) as above, labeled polyamines via dansylation, and resolved the  
232 dansylated polyamines via thin layer chromatography (TLC). When we analyzed mock-infected  
233 cell supernatant, we observed no polyamines, as expected (Figure 3B). The whole cell lysate  
234 (WCL) from cells infected with RVFV contained robust amounts of spermidine and spermine,  
235 though little putrescine was detected. Interestingly, purified RVFV virions exhibited a distinct

Mastrodomenico *et al.*

236 band corresponding to spermidine, and this band was lost when virus was purified from DFMO-  
237 treated cells. LACV also showed virion-associated spermidine, while human rhinovirus serotype  
238 2 (HRV2, enterovirus distantly related to CVB3) had no detectable polyamines, as expected.  
239 These data again detect virion-associated polyamines, which we have identified as spermidine.

240

241 **Polyamines interconvert upon replenishment of DFMO-treated cells.** We next considered  
242 whether we could deplete polyamines from cells, replenish with individual biogenic polyamines  
243 and detect these species in the RVFV virion. To this end, we treated Huh7 cells with 1 mM  
244 DFMO, infected with RVFV at MOI 0.1, and added 10  $\mu$ M putrescine, spermidine, or spermine  
245 individually at the time of infection. As a control, we added ornithine, the polyamine precursor.  
246 As before, we purified and concentrated virions and analyzed polyamine content by thin layer  
247 chromatography. As expected, virions purified from DFMO-treated cells exhibited no  
248 polyamines; however, polyamine supplementation resulted in detectable virion-associated  
249 polyamines (Figure 4A). Interestingly, both putrescine and spermine supplementation led to a  
250 detectable level of virion-associated spermidine. Given that DFMO blocks the production but not  
251 the interconversion of polyamines, we considered that supplemented putrescine and spermine  
252 might generate spermidine through the actions of spermidine synthase (SMS) or polyamine  
253 oxidase (PAOX) with spermidine/spermine acetyltransferase (SAT1). We measured polyamine  
254 levels in DFMO-treated cells that were supplemented with the polyamines and observed that  
255 with putrescine, spermidine, or spermine supplementation, spermidine was abundant on our  
256 TLC (Figure 4B). Thus, the biogenic polyamines rapidly interconvert and specifically spermidine  
257 is virion associated in this polyamine milieu.

258

259 While eukaryotic cells can interconvert the biogenic polyamines, no description of their ability to  
260 interconvert cadaverine or norspermidine has been reported. Thus, we tested whether  
261 supplementation of these polyamines, which rescues viral titers, can support polyamine  
262 packaging. To this end, we generated and purified virus from DFMO-treated cells supplemented  
263 with 10  $\mu$ M cadaverine or norspermidine and measure virion-associated polyamines by TLC.  
264 Curiously, we detected bands near the retention factor (Rf) of spermidine, though not precisely  
265 at spermidine's Rf (Figure 4C). Our standards (Figure 4C, right) suggest that norspermidine is,  
266 in fact, associated with RVFV virions. However, the band in the cadaverine lane was faint and  
267 migrated slightly higher in the chromatogram. This band could be N(3-aminopropyl)cadaverine,  
268 which is a single carbon longer than spermidine, though this molecule has not been described  
269 to be synthesized in human cells. We checked whether we could detect this species in cells



Mastrodomenico *et al.*

270 (Figure 4D), and we can in fact a molecule that runs as N(3-aminopropyl)cadaverine would.  
271 However, we also observe that norspermidine is not interconverted into other detectable  
272 polyamine species. In sum, however, it appears that polyamines within a limit can replace  
273 spermidine for RVFV virions.

274

275 **Methylated spermidine supports RVFV replication and is virion-associated.** Polyamines  
276 rapidly interconvert, as observed (Figure 2B) and previously described. Methylated spermidine  
277 and spermine are not good substrates for acetylation by spermidine/spermine acetyltransferase  
278 and their interconversion is limited. (*R*)-3-methylspermidine is a functionally active and  
279 metabolically stable analog of biogenic spermidine. However, (*R*)-3-methylspermidine is a poor  
280 substrate for spermine synthase and SAT1<sup>36</sup>. Thus, we considered whether methylated  
281 spermidine could enhance viral replication in the absence of biogenic spermidine and if this  
282 modified polyamine could be virion-associated. To test this, we treated cells with DFMO and  
283 replenished with (*R*)-3-methylspermidine (Figure 5A) at the time of infection with RVFV. When  
284 we measured titers at 48 hpi, we observed a full rescue in titers, to a level similar to spermidine.  
285 We titrated (*R*)-3-methylspermidine after DFMO treatment and observed that concentrations  
286 around 10  $\mu$ M were sufficient to fully rescue viral titers (Figure 5B), slightly higher than for  
287 spermidine (Figure 1A). Thus, methylated spermidine functions to support RVFV infection.

288

289 To test if (*R*)-3-methylspermidine could associate with virions, we purified virions and visualized  
290 polyamines by TLC. As expected, we observed that RVFV was associated with spermidine;  
291 however, we could detect bands corresponding to (*R*)-3-methylspermidine as well (Figure 5D),  
292 suggesting that this polyamine is virion-associated. To confirm that 3-methylspermidine was not  
293 interconverted to the biogenic polyamines, we also performed TLC on the treated cells and  
294 observed no such interconversion (Figure 5E).

295

296 We previously showed that virions derived from DFMO-treated cells show no distinctions in their  
297 gross appearance by electron microscopy. To confirm this phenotype as well as to determine  
298 whether polyamine rescue with 3-methylspermidine could change virion morphology, we purified  
299 virions and examined them by electron microscopy. In untreated conditions, we observed  
300 numerous virions of expected size and with visible surface glycoproteins (Figure 5F). As  
301 previously described, DFMO treatment did not noticeably change virion appearance, and  
302 spermidine or 3-methylspermidine supplementation to DFMO-treated cells similarly had no

Mastrodomenico *et al.*

303 discernible effect on virion appearance. Thus, polyamines do not appear to contribute to virion  
304 morphology.

305

306 **Polyamines are transmitted to naïve cells upon infection.** Given that polyamines,  
307 specifically spermidine, are associated with RVFV virions, we considered that virus infection  
308 may transmit polyamines to newly-infected cells. We generated virus stock from untreated and  
309 DFMO-treated cells (Figure 6A) and then used these viruses to infect polyamine-sensitive  
310 luciferase reporter cells. These reporter cells consist of 293T cells transfected with an OAZ1  
311 dual-luciferase construct. Briefly, OAZ1 transcript is sensitive to cellular polyamine levels: high  
312 polyamines result in enhanced stability and translation; low polyamines result in reduced  
313 stability and translation. With this construct, we can measure luciferase activity to indirectly  
314 measure polyamine levels in cells: polyamine levels directly correlate with firefly luciferase  
315 activity, which is normalized to renilla luciferase activity that is polyamine-independent. We  
316 treated these reporter cells with DFMO and observed a significant reduction in luciferase  
317 activity, corresponding to reduced polyamine levels. To these DFMO-treated reporter cells, we  
318 added 10  $\mu$ M polyamines (equimolar mixture of the biogenic polyamines) and observed  
319 enhanced luciferase activity, demonstrating their responsiveness to polyamines. We also added  
320 purified RVFV virions ( $10^3$ ,  $5 \times 10^3$ , and  $10^4$  PFU), for which we observed a dose-dependent  
321 increase in signal (Figure 6B). When we added virus ( $10^4$  pfu) derived from DFMO-treated cells  
322 or when we purified supernatant from mock-infected cells, we did not observe an increase in  
323 luciferase activity, indicating that we are not observing a cellular response to infection or  
324 aberrantly purifying polyamines from cellular supernatant. In sum, these data suggest that  
325 RVFV can transmit polyamines upon infection.

326

327 **RVFV particles devoid of polyamines rapidly lose infectivity.** Polyamines facilitate infection  
328 and polyamine depletion results in the genesis of non-infectious particles. Additionally, we can  
329 detect spermidine (and highly similar non-biogenic polyamines) in purified RVFV. We  
330 hypothesized that these non-infectious particles may be due to a decline in viral infectivity from  
331 a lack of virion-associated polyamines. To test this, we generated virus from untreated and  
332 DFMO-treated Huh7 cells and incubated the cell-free supernatant at 37°C for 24h, taking  
333 samples at regular intervals to titer. We observed that virus derived from untreated cells slowly  
334 declined in titer (Figure 7A), resulting in a modest reduction in titers over 24h. The calculated  
335 half-life of the virus was approximately 29.4h. In contrast, virus derived from DFMO-treated cells

Mastrodomenico *et al.*

336 rapidly lost infectivity, with titers dropping by about 90% within 24h and a half-life of  
337 approximately 14.4h. Thus, polyamine-depleted cells generate virus that rapidly loses infectivity.

338

339 We first considered that DFMO itself was destabilizing RVFV virions. Thus, we incubated virus  
340 with 1 mM or 500  $\mu$ M DFMO for 24h at 37°C. We observed that DFMO itself did not destabilize  
341 the virus, as titers were equivalent between untreated and DFMO-treated viruses (Figure 7B).  
342 Because spermidine is found in association with purified RVFV virions, we next hypothesized  
343 that polyamines themselves may stabilize virions. To this end, we incubated virus generated  
344 from untreated or DFMO-treated cells with 10  $\mu$ M spermidine or spermine and incubated at  
345 37°C for 24h. We observed decay of the virus derived from DFMO-treated cells accelerated  
346 compared to untreated cells, with no difference regardless of polyamine treatment (Figure 7C).  
347 These data suggest that polyamines do not stabilize RVFV when added exogenously. Together,  
348 these data suggest that polyamines help to maintain infectivity, that this is not due to DFMO  
349 itself, and that exogenous polyamines cannot stabilize virions.

350

351 To extend these results to the related bunyavirus LACV, we similarly incubated virus derived  
352 from untreated and DFMO-treated conditions and measured infectivity over 24h. As with RVFV,  
353 we observed a steep decline in virus titers, though the effect was primarily at 48 hpi (Figure 7D).  
354 Thus, LACV exhibits similar sensitivity to losing infectivity when the virus is derived from DFMO-  
355 treated cells.

356

357 Finally, we considered whether we could potentially resurrect infectivity of our viral particles by  
358 incubating them with polyamines, specifically spermidine. To this end, we incubated virus from  
359 untreated and DFMO conditions with increasing doses of spermidine for 24h at 37°C. We  
360 observed no significant difference in titer from spermidine treatment (Figure 7E), suggesting that  
361 spermidine supplementation cannot rescue infectivity of the virions once they have lost  
362 infectivity.

363

## 364 **Discussion**

365 As obligate intracellular pathogens, viruses rely on the host to provide metabolites for  
366 replication. The virion itself is composed of molecules derived from the host but directed for  
367 assembly and order by the viral genome. The genomic nucleotides, proteins' amino acids, and  
368 envelope's lipids originate from host metabolites. Here, we identify polyamines as an additional  
369 host-derived metabolite associated with bunyavirus virions. Previous reports have identified

Mastrodomenico *et al.*

370 polyamines in the virions of herpesviruses<sup>21</sup> and poxviruses<sup>22</sup>. However, other viruses do not  
371 appear to consistently incorporate polyamines into virions. For example, negligible amounts of  
372 polyamines are detected associated with poliovirus capsids, but rhinovirus 14 had a detectable  
373 amount, enough to neutralize approximately 16% of the genome<sup>23</sup>. Adenovirus-5, a DNA virus,  
374 also appears to incorporate small amounts of polyamines<sup>37</sup>. Thus, the packaging of polyamines  
375 and the role(s) of these packaged polyamines is not necessarily evolutionarily conserved.  
376 Additionally, the presence of these polyamines had not been examined in bunyaviruses.

377

378 We specifically observe that spermidine is associated with RVFV and LACV virions, despite  
379 cellular polyamine pools comprising primarily spermidine and spermine. Other viruses  
380 incorporate polyamines without specificity; for example, densoviruses have all three polyamines  
381 in purified virus<sup>38</sup>. Interestingly, herpesviruses package spermidine and spermine, with  
382 spermidine primarily associated with the envelope or tegument and spermine in the viral  
383 capsid<sup>21</sup>. Given that bunyaviruses like RVFV do not have a bona fide capsid, one could  
384 speculate that the viral envelope specifically associates with spermidine, given that both viruses  
385 have a lipid membrane component. The localization of polyamines in RVFV may further inform  
386 the function of these polyamines in the virion. Additionally, the mechanism by which virions  
387 incorporate spermidine but exclude the other polyamines is not known for this or other viruses.  
388 Whether spermidine incorporation is an active process by the virus or a product of RNA-,  
389 protein-, or lipid-spermidine interactions will be an important distinction to make.

390

391 Despite the specific association of spermidine with purified virions, we observe that any of the  
392 biogenic polyamines (putrescine, spermidine, and spermine) supports viral infection.  
393 Importantly, when treating cells with these polyamines, they interconvert and produce the full  
394 complement of cellular polyamines. In fact, we observe this in our system, and those cells  
395 replenished with any of the biogenic polyamines support virus infection and spermidine  
396 association with virions. Thus, the balance of polyamines is crucial to cellular homeostasis<sup>16</sup> and  
397 virus replication. Interestingly, RVFV exhibits some flexibility in polyamine utilization, as we can  
398 detect molecules that are a single carbon longer or shorter than spermidine in virions.  
399 Interestingly, cells exhibit heterogeneity in their polyamine composition and, thus, if viruses  
400 differentially utilize polyamines, the cellular polyamine composition may alter infection and  
401 pathogenesis. Regardless, whether distinct polyamines function differently during RVFV  
402 infection remains to be fully understood.

403

Mastrodomenico *et al.*

404 We previously observed that polyamine depletion led to the accumulation of noninfectious viral  
405 particles that interfered with productive virus infection<sup>27</sup>. We were unable to find a physical  
406 distinction between infectious and noninfectious virions, however. These studies suggest that a  
407 component of the virus that may be maintaining infectivity is spermidine, as viruses lacking  
408 polyamines are more labile than viruses propagated in cells with polyamines. However, these  
409 results do not preclude that an additional polyamine-modulated factor may contribute to virion  
410 stability. In fact, polyamine depletion affects several cellular processes. Regardless, we observe  
411 that polyamine depletion generates viral particles lacking polyamines that rapidly lose infectivity.  
412 Future work will address the mechanisms behind this lability.

413  
414 Diverse viruses rely on polyamines for their replication, and the diversity of viruses may rely on  
415 different polyamines for different processes. For example, Ebolavirus, a filovirus, utilizes  
416 polyamines for genome replication but hypusine, derived from spermidine, for protein  
417 translation<sup>33,34</sup>. As mentioned, herpesviruses package spermidine in viral envelope/tegument  
418 and spermine in capsids<sup>21</sup>. Whether these phenotypes are broadly shared is unclear, but  
419 understanding the mechanisms by which viruses utilize polyamines may highlight both  
420 evolutionarily conserved and divergent mechanisms. Importantly, however, the requirement of  
421 polyamines for productive infection is broadly shared<sup>25</sup>, and targeting polyamine metabolism  
422 through host-directed antivirals represents a promising means of blocking virus infection.

423

## 424 **Materials and Methods**

425 **Cell culture.** Cells were maintained at 37°C in 5% CO<sub>2</sub>, in Dulbecco's modified Eagle's  
426 medium (DMEM; Life Technologies) with bovine serum and penicillin-streptomycin. Vero cells  
427 (BEI Resources) were supplemented with 10% new-born calf serum (NBCS; Thermo-Fischer)  
428 and Huh7 cells, kindly provided by Dr. Susan Uprichard, were supplemented with 10% fetal  
429 bovine serum (FBS; Thermo-Fischer).

430

431 **Drug treatment.** Difluoromethylornithine (DFMO; TargetMol) and N1,N11-Diethylnorspermine  
432 (DENSpM; Santa Cruz Biotechnology) were diluted to 100x solution (100mM and 10mM,  
433 respectively) in sterile water. For DFMO treatments, cells were trypsinized (Zymo Research)  
434 and reseeded with fresh medium supplemented with 2% serum. Following overnight  
435 attachment, cells were treated with 100 µM, 500 µM, 1 mM, or 5 mM DFMO. Cells were  
436 incubated with DFMO for 96 hours to allow for depletion of polyamines in Huh7 cells. For  
437 DENSpM treatment, cells were treated with 100 nM, 1 µM, 10 µM, 100 µM, and 1mM 16 hours

Mastrodomenico *et al.*

438 prior to infection. During infection, media was cleared and saved from the cells. The same  
439 medium containing DFMO and DENSpM was then used to replenish the cells following  
440 infection. Cells were incubated at the appropriate temperature for the duration of the infection.  
441 Polyamines (Sigma-Aldrich) were added to cells at the time of infection. Methylated spermidine  
442 (3-methylspermidine) was derived as described previously<sup>39</sup> and were added at the time of  
443 infection.

444

445 **Infection and enumeration of viral titers.** RVFV MP-12<sup>40</sup> and LACV were derived from the  
446 first passage of virus in Huh7 cells. CVB3 (Nancy strain) was derived from the first passage of  
447 virus in Vero-E6 cells. LACV was obtained from Biodefense and Emerging Infections (BEI)  
448 Research Resources. For all infections, DFMO and DENSpM were maintained throughout  
449 infection as designated. Viral stocks were maintained at -80°C. For infection, virus was diluted  
450 in serum-free DMEM for a multiplicity of infection (MOI) of 0.1 on Huh7 cells, unless otherwise  
451 indicated. Viral inoculum was overlain on cells for 10 to 30 minutes, and the cells were washed  
452 with PBS before replenishment of media. Dilutions of cell supernatant were prepared in serum-  
453 free DMEM and used to inoculate confluent monolayer of Vero cells for 30 min at 37°C. Cells  
454 were overlain with 0.8% agarose in DMEM containing 2% NBCS. CVB3 samples were  
455 incubated for 2 days, RVFV and LACV samples were incubated for 4 days at 37°C. Following  
456 appropriate incubation, cells were fixed with 4% formalin and revealed with crystal violet solution  
457 (10% crystal violet; Sigma-Aldrich). Plaques were enumerated and used to back-calculate the  
458 number of plaque forming units (pfu) per milliliter of collected volume.

459

460 **Virus infectivity assay.**

461 RVFV from not-treated or DFMO-treated conditions were incubated at 37°C for 24 hours.  
462 Subsequent addition of polyamines (10uM spermidine and 10uM spermine) were added to not-  
463 treated or DFMO treated virus and incubated at 37°C for 24 hours. LACV virus from not-treated  
464 or DFMO treated conditions were incubated at 37°C for 52 hours. Supernatant was collected at  
465 the indicated time points and viral titer was obtained via plaque assay.

466

467 **Thin layer chromatography determination of polyamines.** Polyamines were separated by  
468 thin-layer chromatography as previously described<sup>41</sup>. For all samples, cells were treated as  
469 described prior to being trypsinized and centrifuged. Pellets were washed with PBS and then  
470 resuspended in 200 uL 2% perchloric acid. Samples were then incubated overnight at 4°C. 200  
471 uL of supernatant was combined with 200 uL 5 mg/ml dansyl chloride (Sigma Aldrich) in

Mastrodomenico *et al.*

472 acetone and 100  $\mu$ L saturated sodium bicarbonate. Samples were incubated in the dark  
473 overnight at room temperature. Excess dansyl chloride was cleared by incubating the reaction  
474 with 100  $\mu$ L 150 mg/mL proline (Sigma Aldrich). Dansylated polyamines were extracted with 50  
475  $\mu$ L toluene (Sigma Aldrich) and centrifuged. 5  $\mu$ L of sample was added in small spots to the TLC  
476 plate (silica gel matrix; Sigma Aldrich) and exposed to ascending chromatography with 1:1  
477 cyclohexane: ethylacetate. Plate was dried and visualized via exposure to UV.

478

479 **Polyamine luciferase reporter assay.** To measure free polyamine levels in cells, a dual-  
480 luciferase vector containing the wild-type -1 frameshift antizyme OAZ1 (pC5730) or a dual-  
481 luciferase vector containing an in-frame control (pC6154), kindly sent to us by Dr. Tom Dever  
482 from the National Institutes of Health, were transfected into cells. Free polyamines modulate  
483 OAZ1 mRNA frameshifting and these constructs can measure relative endogenous polyamine  
484 concentrations via a dual-luciferase reporter as previously described<sup>42</sup>. 293T cells were seeded  
485 with 2% media and drug treated as described above. Cells were transfected with 62.5 ng of  
486 either pC5730 or pC6154. After 4h, cells were infected where indicated. After 24 hours of  
487 incubation, luminescent signal was measured using the Dual-Luciferase Reporter Assay System  
488 (Promega) by measuring both firefly and *Renilla* luciferase with the Veritas Microplate  
489 Luminometer (Turner Biosystems). Firefly luciferase was normalized to *Renilla* and the wild-type  
490 values were compared to an in-frame control. These values were normalized to untreated cells  
491 as relative light units to obtain relative polyamine content.

492

493 **RNA purification and cDNA synthesis.** Media was cleared from cells and Trizol reagent  
494 (Zymo Research) directly added. Lysate was then collected, and RNA was purified according to  
495 the manufacturer's protocol utilizing the Direct-zol RNA Miniprep Plus Kit (Zymo Research).  
496 Purified RNA was subsequently used for cDNA synthesis using High Capacity cDNA Reverse  
497 Transcription Kits (Thermo-Fischer), according to the manufacturer's protocol, with 10-100 ng of  
498 RNA and random hexamer primers.

499

500 **Viral genome quantification.** Following cDNA synthesis, qRT-PCR was performed using the  
501 QuantStudio3 (Applied Biosystems by Thermo-Fischer) and SYBR green mastermix  
502 (DotScientific). Samples were held at 95°C for 2 mins prior to 40 cycles of 95°C for 1s and  
503 60°C for 30s. Primers were verified for linearity using eight-fold serial diluted cDNA and  
504 checked for specificity via melt curve analysis following by agarose gel electrophoresis. All  
505 samples were used to normalize to total RNA using the  $\Delta C_T$  method. Primers against the RVFV

Mastrodomenico *et al.*

506 small genome were 5'-CAG-CAG-CAA-CTC-GTG-ATA-GA-3' (forward) and 5'-CCC-GGA-GGA-  
507 TGA-TGA-TGA-AA-3'. Primers for LACV small genome were 5'-GGC-AGG-TGG-AGG-TTA-  
508 TCA-AT-3' (forward) and 5'-AAG-GAC-CCA-TCT-GGC-TAA-ATA-C-3' (reverse). GAPDH  
509 primers were 5'-GAT-TCC-ACC-CAT-GGC-AAA-TTC-3' (forward) and 5'-CTG-GAA-GAT-GGT-  
510 GAT-GGG-ATT-3' (reverse).

511

512 **Genome-to-PFU ratio calculations.** The number of viral genomes quantified as described  
513 above were divided by the viral titer, as determined by plaque assay, to measure the genome-  
514 to-PFU ratio. Values obtained were normalized to untreated conditions to obtain the relative  
515 genome-to-PFU ratio.

516

517 **Transmission electron microscopy.** Four microliters of purified virus were applied to a  
518 Formvar- and carbon-coated 400-mesh copper grid (Electron Microscopy Sciences, Hatfield,  
519 PA) for 25 seconds. Sample was removed by blotting, and another 4  $\mu$ L of purified virus was  
520 applied for 25 seconds, blotted, and stained with 2% uranyl acetate for 25 seconds. The stained  
521 grids were analyzed using a JEOL 1010 transmission electron microscope (Tokyo, Japan)  
522 operating at 80 kV. Images were recorded using a Gatan (Pleasanton, CA) UltraScan 4000  
523 charge-coupled-device camera at a magnification of 40,000X.

524

525 **Spinoculation and indirect immunofluorescence.** Virus was spinoculated onto coverslips by  
526 centrifugation at 1200 rpm for 2 hours. Coverslips were subsequently fixed with 4% formalin  
527 overnight, washed with PBS, permeabilized and blocked with 0.2% Triton X-100 and 2% BSA in  
528 PBS (blocking solution) for 60 minutes at room temperature (RT). Cells were sequentially  
529 incubated as follows: Primary mouse anti-Gn antibody (1:1000 in blocking solution, overnight at  
530 4°C), and secondary antibody, goat anti-mouse 488nm, (1:1000 in PBS, 2hr, RT). After washing  
531 with PBS, cells were mounted with Everbrite Hardset Mounting Medium (Biotium ) overnight. To  
532 ensure that signal was not due to impurities, mock-infected supernatant was used as a control  
533 and processed in tandem. Samples were imaged with Zeiss Axio Observer 7 with Lumencor  
534 Spectra X LED light system and a Hamamatsu Flash 4 camera using appropriate filters using  
535 Zen Blue software with a 40X objective (Images were collected with a DeltaVision microscope  
536 (Applied Precision) detected with a digital camera (CoolSNAP HQ:Photometrics) with a 60X  
537 objective). Images were deconvoluted using SoftWoRx deconvolution software (Applied  
538 Precision) and quantified by ImageJ.

539



Mastrodomenico *et al.*

540 **Statistical Analysis.** Prism 6 (GraphPad) was used to generate graphs and perform statistical  
541 analysis. For all analyses, one-tailed Student's t test was used to compare groups, unless  
542 otherwise noted, with  $\alpha = 0.05$ . For tests of sample proportions, p values were derived from  
543 calculated Z scores with two tails and  $\alpha = 0.05$ .

544

## 545 **Acknowledgments**

546 We are gracious to Thomas Gallagher for critical discussion and helpful insights concerning this  
547 project. We thank Susan Uprichard for Huh7 cells and Makio Iwashima for THP-1 cells, as well  
548 as helpful discussion. We also thank Shinji Makino and Kaori Terasaki for generously providing  
549 the MP-12 strain of RVFV. We appreciate immunofluorescent imaging help and input from the  
550 labs of Ivana Kuo and Jordan Beach. Synthesis of (*R*)-isomer of 3-MeSpd was supported by  
551 grant of Russian Scientific Foundation #17-74-20049.

552

## 553 **References**

- 554 1. Schuffenecker, I. *et al.* Genome Microevolution of Chikungunya Viruses Causing the Indian  
555 Ocean Outbreak. *PLoS Med.* **3**, e263 (2006).
- 556 2. Wikan, N. & Smith, D. R. Zika virus: history of a newly emerging arbovirus. *Lancet Infect.*  
557 *Dis.* **16**, e119–e126 (2016).
- 558 3. Tantely, L. M., Boyer, S. & Fontenille, D. A Review of Mosquitoes Associated with Rift  
559 Valley Fever Virus in Madagascar. *Am. J. Trop. Med. Hyg.* **92**, 722–729 (2015).
- 560 4. Sang, R. *et al.* Distribution and abundance of key vectors of Rift Valley fever and other  
561 arboviruses in two ecologically distinct counties in Kenya. *PLoS Negl. Trop. Dis.* **11**,  
562 e0005341 (2017).
- 563 5. Seufi, A. M. & Galal, F. H. Role of Culex and Anopheles mosquito species as potential  
564 vectors of rift valley fever virus in Sudan outbreak, 2007. *BMC Infect. Dis.* **10**, 65 (2010).
- 565 6. Smith, D. R. *et al.* Attenuation and efficacy of live-attenuated Rift Valley fever virus vaccine  
566 candidates in non-human primates. *PLoS Negl. Trop. Dis.* **12**, e0006474 (2018).
- 567 7. Ikegami, T. Rift Valley fever vaccines: an overview of the safety and efficacy of the live-  
568 attenuated MP-12 vaccine candidate. *Expert Rev. Vaccines* **16**, 601–611 (2017).
- 569 8. Faburay, B., LaBeaud, A. D., McVey, D. S., Wilson, W. C. & Richt, J. A. Current Status of  
570 Rift Valley Fever Vaccine Development. *Vaccines* **5**, (2017).
- 571 9. Sang, R. *et al.* Rift Valley Fever Virus Epidemic in Kenya, 2006/2007: The Entomologic  
572 Investigations. *Am. J. Trop. Med. Hyg.* **83**, 28–37 (2010).

Mastrodomenico *et al.*

- 573 10. Woods, C. W. *et al.* An Outbreak of Rift Valley Fever in Northeastern Kenya, 1997-98.  
574 *Emerg. Infect. Dis.* **8**, 138–144 (2002).
- 575 11. Balkhy, H. H. & Memish, Z. A. Rift Valley fever: an uninvited zoonosis in the Arabian  
576 peninsula. *Int. J. Antimicrob. Agents* **21**, 153–157 (2003).
- 577 12. Gerner, E. W. & Meyskens, F. L. Polyamines and cancer: old molecules, new  
578 understanding. *Nat. Rev. Cancer* **4**, 781–792 (2004).
- 579 13. Frugier, M., Florentz, C., Hosseini, M. W., Lehn, J. M. & Giegé, R. Synthetic polyamines  
580 stimulate in vitro transcription by T7 RNA polymerase. *Nucleic Acids Res.* **22**, 2784–2790  
581 (1994).
- 582 14. Mandal, S., Mandal, A., Johansson, H. E., Orjalo, A. V. & Park, M. H. Depletion of cellular  
583 polyamines, spermidine and spermine, causes a total arrest in translation and growth in  
584 mammalian cells. *Proc. Natl. Acad. Sci. U. S. A.* **110**, 2169–2174 (2013).
- 585 15. Pegg, A. E. Mammalian Polyamine Metabolism and Function. *IUBMB Life* **61**, 880–894  
586 (2009).
- 587 16. Seiler, N., Bolkenius, F. N. & Rennert, O. M. Interconversion, catabolism and elimination of  
588 the polyamines. *Med. Biol.* **59**, 334–346 (1981).
- 589 17. van Dam, L., Korolev, N. & Nordenskiöld, L. Polyamine–nucleic acid interactions and the  
590 effects on structure in oriented DNA fibers. *Nucleic Acids Res.* **30**, 419–428 (2002).
- 591 18. Loprinzi, C. L. *et al.* Toxicity evaluation of difluoromethylornithine: doses for  
592 chemoprevention trials. *Cancer Epidemiol. Prev. Biomark.* **5**, 371–374 (1996).
- 593 19. Milord, F., Pépin, J., Loko, L., Ethier, L. & Mpia, B. Efficacy and toxicity of eflornithine for  
594 treatment of *Trypanosoma brucei gambiense* sleeping sickness. *Lancet* **340**, 652–655  
595 (1992).
- 596 20. Burri, C. & Brun, R. Eflornithine for the treatment of human African trypanosomiasis.  
597 *Parasitol. Res.* **90 Supp 1**, S49-52 (2003).
- 598 21. Gibson, W. & Roizman, B. Compartmentalization of spermine and spermidine in the herpes  
599 simplex virion. *Proc. Natl. Acad. Sci. U. S. A.* **68**, 2818–2821 (1971).
- 600 22. Lanzer, W. & Holowczak, J. A. Polyamines in vaccinia virions and polypeptides released  
601 from viral cores by acid extraction. *J. Virol.* **16**, 1254–1264 (1975).
- 602 23. Fout, G. S., Medappa, K. C., Mapoles, J. E. & Rueckert, R. R. Radiochemical determination  
603 of polyamines in poliovirus and human rhinovirus 14. *J. Biol. Chem.* **259**, 3639–3643 (1984).
- 604 24. Mounce, B. C. *et al.* Interferon-Induced Spermidine-Spermine Acetyltransferase and  
605 Polyamine Depletion Restrict Zika and Chikungunya Viruses. *Cell Host Microbe* **20**, 167–  
606 177 (2016).

Mastrodomenico *et al.*

- 607 25. Mounce, B. C. *et al.* Inhibition of Polyamine Biosynthesis Is a Broad-Spectrum Strategy  
608 against RNA Viruses. *J. Virol.* **90**, 9683–9692 (2016).
- 609 26. Dial, C. N., Tate, P. M., Kicmal, T. M. & Mounce, B. C. Coxsackievirus B3 Responds to  
610 Polyamine Depletion via Enhancement of 2A and 3C Protease Activity. *Viruses* **11**, 403  
611 (2019).
- 612 27. Mastrodomenico, V. *et al.* Polyamine depletion inhibits bunyavirus infection via generation  
613 of noninfectious interfering virions. *J. Virol.* JVI.00530-19 (2019) doi:10.1128/JVI.00530-19.
- 614 28. Kicmal, T. M., Tate, P. M., Dial, C. N., Esin, J. J. & Mounce, B. C. Polyamine depletion  
615 abrogates enterovirus cellular attachment. *J. Virol.* JVI.01054-19 (2019)  
616 doi:10.1128/JVI.01054-19.
- 617 29. Cohen, S. S., Morgan, S. & Streibel, E. THE POLYAMINE CONTENT OF THE tRNA OF E.  
618 coli. *Proc. Natl. Acad. Sci.* **64**, 669–676 (1969).
- 619 30. Ouameur, A. A., Bourassa, P. & Tajmir-Riahi, H.-A. Probing tRNA interaction with biogenic  
620 polyamines. *RNA N. Y. N* **16**, 1968–1979 (2010).
- 621 31. Dever, T. E., Gutierrez, E. & Shin, B.-S. The hypusine-containing translation factor eIF5A.  
622 *Crit. Rev. Biochem. Mol. Biol.* **49**, 413–425 (2014).
- 623 32. Schnier, J., Schwelberger, H. G., Smit-McBride, Z., Kang, H. A. & Hershey, J. W.  
624 Translation initiation factor 5A and its hypusine modification are essential for cell viability in  
625 the yeast *Saccharomyces cerevisiae*. *Mol. Cell. Biol.* **11**, 3105–3114 (1991).
- 626 33. Olsen, M. E. *et al.* Polyamines and Hypusination Are Required for Ebolavirus Gene  
627 Expression and Replication. *mBio* **7**, (2016).
- 628 34. Olsen, M. E., Cressey, T. N., Mühlberger, E. & Connor, J. H. Differential Mechanisms for the  
629 Involvement of Polyamines and Hypusinated eIF5A in Ebola Virus Gene Expression. *J.*  
630 *Virol.* **92**, (2018).
- 631 35. Schreur, P. J. W. & Kortekaas, J. Single-Molecule FISH Reveals Non-selective Packaging  
632 of Rift Valley Fever Virus Genome Segments. *PLOS Pathog.* **12**, e1005800 (2016).
- 633 36. Hyvönen, M. T. *et al.* Enantiomers of 3-methylspermidine selectively modulate  
634 deoxyhypusine synthesis and reveal important determinants for spermidine transport. *ACS*  
635 *Chem. Biol.* **10**, 1417–1424 (2015).
- 636 37. Pett, D. M. & Ginsberg, H. S. Polyamines in Type 5 Adenovirus-Infected Cells and Virions.  
637 *J. Virol.* **15**, 1289–1292 (1975).
- 638 38. Kelly, D. C. & Elliott, R. M. Polyamines contained by two denonucleosis viruses. *J. Virol.*  
639 **21**, 408–410 (1977).

Mastrodomenico *et al.*

- 640 39. Khomutov, A. R. *et al.* Methylated polyamines as research tools. *Methods Mol. Biol. Clifton*  
641 *NJ* **720**, 449–461 (2011).
- 642 40. Ikegami, T., Won, S., Peters, C. J. & Makino, S. Rescue of infectious rift valley fever virus  
643 entirely from cDNA, analysis of virus lacking the NSs gene, and expression of a foreign  
644 gene. *J. Virol.* **80**, 2933–2940 (2006).
- 645 41. Madhubala, R. Thin-layer chromatographic method for assaying polyamines. *Methods Mol.*  
646 *Biol. Clifton NJ* **79**, 131–136 (1998).
- 647 42. Ivanov, I. P. *et al.* Polyamine Control of Translation Elongation Regulates Start Site  
648 Selection on Antizyme Inhibitor mRNA via Ribosome Queuing. *Mol. Cell* **70**, 254-264.e6  
649 (2018).

650

## 651 **Figure Legends**

652 **Figure 1. Biogenic and non-biogenic polyamines support RVFV replication.** Huh7 cells  
653 were treated for four days with 1 mM DFMO and then infected with (A) RVFV or (B) LACV at  
654 MOI 0.1. Putrescine, spermidine, and spermine were added directly to the media at the time of  
655 infection at the concentration listed. Titers were determined by plaque assay at 48 hpi. (C)  
656 Chemical structures of polyamines analyzed for their ability to support viral infection of (D)  
657 RVFV and (E) LACV. Cells were treated as in (A) and (B) but at the time of infection, cells were  
658 supplemented with 10  $\mu$ M polyamine as indicated. Titers were determined at 48 hpi. (D) Huh7  
659 cells were treated as in (A) and subsequently infected with CVB3 at MOI 0.1 for 24h. Titers were  
660 determined by plaque assay. (G) CVB3 infections were treated with 10  $\mu$ M putrescine (put),  
661 spermidine (spd), spermine (spm), norspermidine (nsp), and cadaverine (cad). Titers were  
662 determined at 24 hpi. Error bars represent one standard error of the mean. \* $p < 0.05$ , \*\* $p < 0.01$ ,  
663 \*\*\* $p < 0.001$  by two-tailed Student's T-test. Comparisons in (D), (E), and (G) are DFMO versus  
664 treatment or as indicated.

665

666 **Figure 2. Biogenic polyamines enhance infectious particle production.** Huh7 cells were  
667 treated for four days with 1 mM DFMO and subsequently infected at MOI 0.1 with (A) RVFV and  
668 (B) LACV for 48 h. Polyamines at 10  $\mu$ M were added as indicated at the time of infection, and  
669 titers were determined by plaque assay and genome content determined by qPCR on reverse-  
670 transcribed viral RNA purified from cellular supernatant. Genome/PFU ratio was calculated by  
671 dividing the relative number of genomes by the viral titer. (C) Virus prepared as in (A) was  
672 spinoculated onto coverslips, fixed, and stained with anti-Gn or anti-Gc antibody. Mock-infected  
673 cell supernatant was similarly spinoculated as a control. (D) Virus prepared as in (A) was

Mastrodomenico *et al.*

674 spinoculated and stained with anti-Gn and FITC secondary. Representative images from mock-  
675 infected, untreated infected, and DFMO-treated infected samples are shown in the green and  
676 red channels. (E) Particles from (D) were quantified with ImageJ and compared to viral titers to  
677 obtain (F) particle-to-PFU ratio. Images are representative from at least three independent  
678 preparations. Error bars represent one standard error of the mean. \* $p < 0.05$ , \*\* $p < 0.01$ ,  
679 \*\*\* $p < 0.001$  comparing untreated to treated conditions, unless otherwise specified, using a two-  
680 tailed Student's T-test.

681

682 **Figure 3. Polyamines associate with RVFV virions.** Huh7 cells were treated for four days  
683 with 1 mM DFMO and infected at MOI 0.1 with CVB3, VACV, RVFV, LACV, or HRV2. At 48 hpi,  
684 cellular supernatant was collected and virus pelleted through a sucrose cushion prior to analysis  
685 by (A) fluorometric assay analyzing total polyamine content or (B) thin layer chromatography.  
686 Individual polyamines are indicated as put (putrescine), spd (spermidine) and spm (spermine).  
687 Error bars represent standard error of the mean. \* $p < 0.05$ , \*\* $p < 0.01$  by two-tailed Student's T-  
688 test comparing groups as indicated. Chromatogram displayed is representative of  $n=3$   
689 independent experiments.

690

691 **Figure 4. Polyamines interconvert upon replenishment of DFMO-treated cells.** Huh7 cells  
692 were treated for four days with 1 mM DFMO and infected with RVFV at MOI 0.1 for 48 hpi.  
693 Polyamines were added to the cells at the time of infection. At 48 hpi, cells were collected and  
694 cellular supernatant virus purified for polyamine extraction. Polyamines were then visualized in  
695 (A) purified virions and (B) cells by thin layer chromatography. (C) Cells were treated and  
696 infected as in (A) but were supplemented with cadaverine (cad) or norspermidine (nor).  
697 Polyamine content of (C) purified virions and (D) cells was analyzed by thin layer  
698 chromatography. Chromatograms are representative of three independent experiments. (E)  
699 Virus prepared as in (C) were spinoculated onto coverslips, stained with anti-Gn antibody, and  
700 viral particles quantified. Particle counts were compared to titers to obtain the particle-to-PFU  
701 ratio. Error bars represent one standard error of the mean. No significant differences were  
702 determined by two-tailed Student's T-test.

703

704 **Figure 5. Methylated spermidine supports RVFV replication and is virion-associated.** (A)  
705 Huh7 cells were treated with 1 mM DFMO for four days prior to infection with RVFV at MOI 0.1.  
706 Cells were supplemented with spermidine (Spd) and (*R*)-3-methylspermidine (MeSpd) at 10  $\mu$ M.  
707 Viral titers were determined at 48 hpi. (B) Cells were treated and infected as in (A) but with

Mastrodomenico *et al.*

708 increasing concentrations of (*R*)-3-methylspermidine. Titers were determined at 48 hpi. (C) Cells  
709 were treated and infected as in (A) and at 48 hpi, cellular supernatant was collected, virions  
710 purified, and polyamines extracted for analysis by thin layer chromatography. (D) Cells from (C)  
711 were collected and polyamine content analysed. (E) Representative electron micrographs of  
712 virus derived from untreated, DFMO-treated, or polyamine-supplemented conditions. Error bars  
713 represent one standard error of the mean.

714

715 **Figure 6. Polyamines are introduced to target cells upon infection.** (A) Schematic of  
716 experimental setup. (B) 293T cells were treated with 1 mM DFMO for four days and  
717 subsequently transfected with a polyamine-sensitive dual-luciferase construct. Cells were  
718 subsequently left not treated (NT), supplemented with polyamines (a 100  $\mu$ M mix of putrescine,  
719 spermidine, and spermine), or infected with purified RVFV as indicated. Luciferase activity was  
720 measured 24h later to calculate the relative polyamine content. RVFV-DFMO is RVFV derived  
721 from DFMO-treated, polyamine-depleted cells. Mock prep indicates treatment of transfected  
722 cells with supernatant purified as with virus purification. \* $p < 0.05$ , \*\* $p < 0.01$ , \*\*\* $p < 0.001$ , NS - not  
723 significant using a two-tailed Student's T-test with comparisons as indicated.

724

725 **Figure 7. Polyamines maintain infectivity of bunyavirus particles.** (A) RVFV derived from  
726 untreated or DFMO-treated cells was incubated at 37°C for the indicated time, when viral titers  
727 were determined by plaque assay. (B) RVFV stock virus was incubated with increasing doses of  
728 DFMO for 24h at 37°C. (C) Virus derived as in (A) was incubated with exogenous spermidine  
729 (Spd) or spermine (Spm) at 37°C for the indicated time prior to titering by plaque assay. (D)  
730 LACV derived and treated as in (A) was incubated at 37°C and titered by plaque assay. (E)  
731 RVFV was incubated with increasing doses of exogenous spermidine (Spd) for 24h at 37°C  
732 prior to plaque assay. \* $p < 0.05$ , \*\* $p < 0.01$ , \*\*\* $p < 0.001$ , NS not significant by two-tailed Student's  
733 T-test comparing not treated (NT) conditions to DFMO.

734

735

736

Figure 1. Biogenic and nonbiogenic polyamines support RVFV replication.

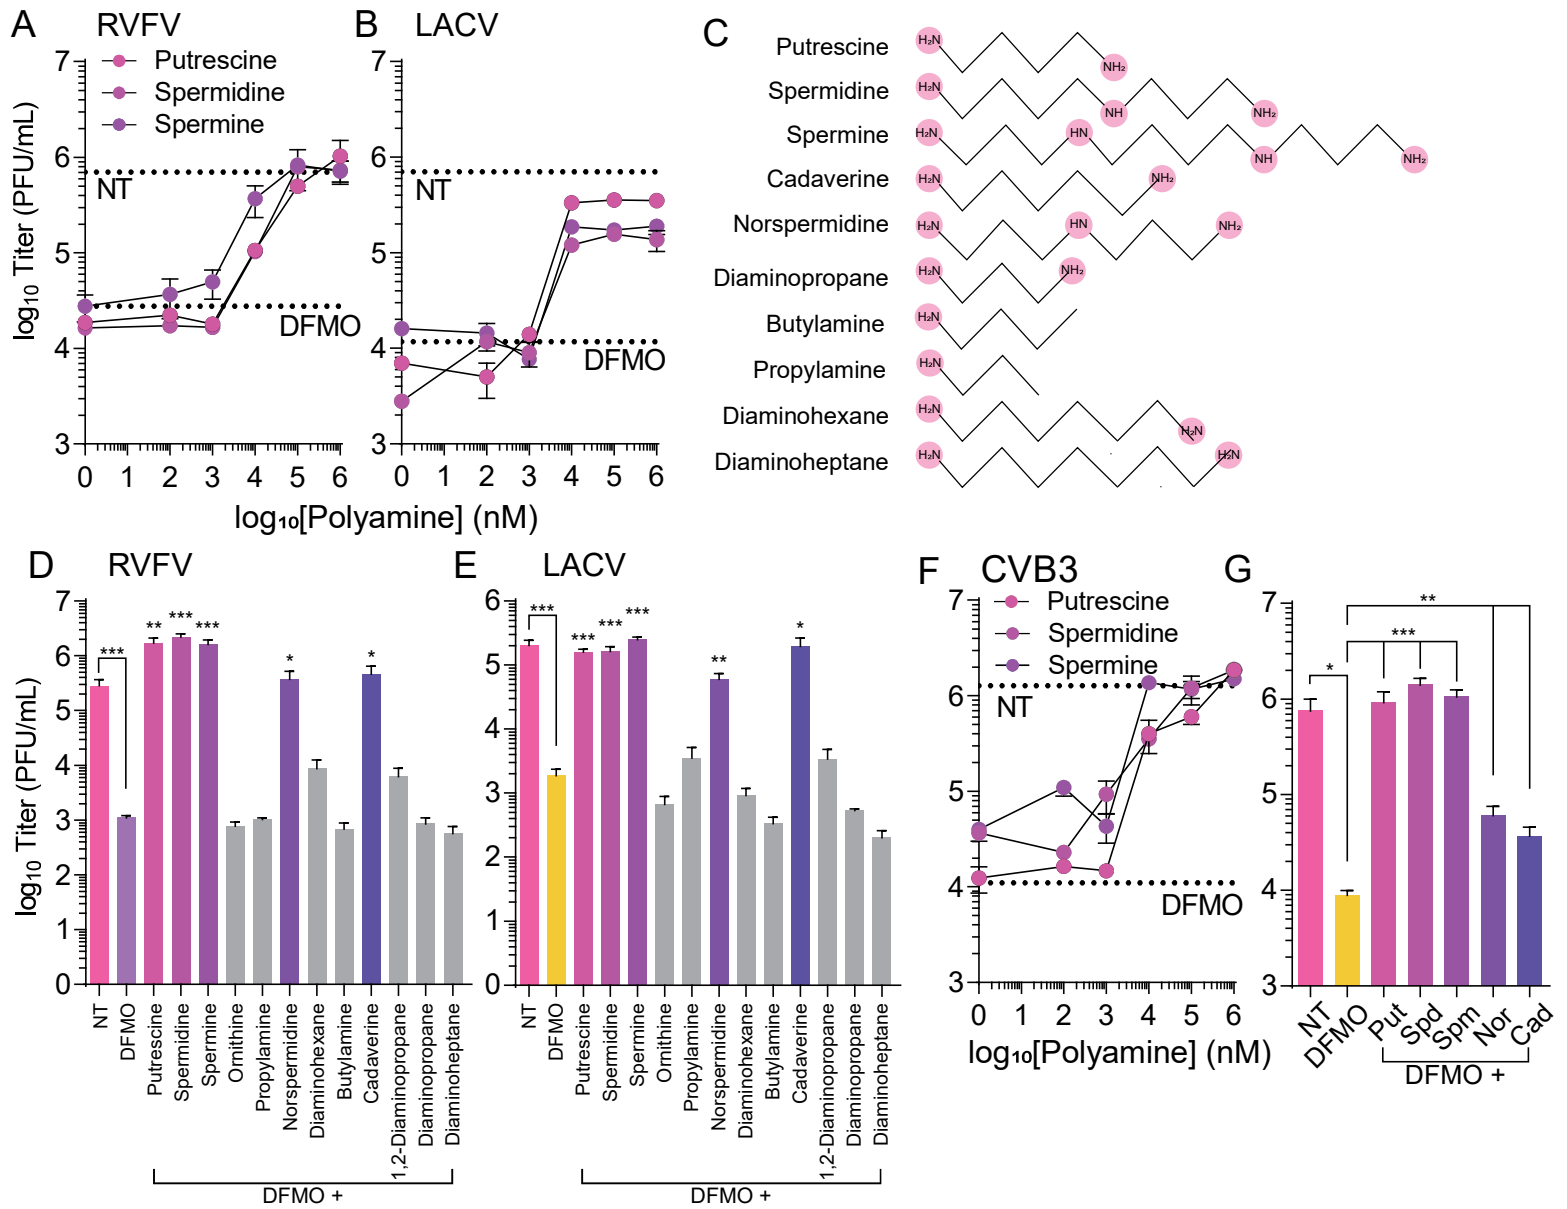

Figure 2. Biogenic polyamines enhance specific infectivity.

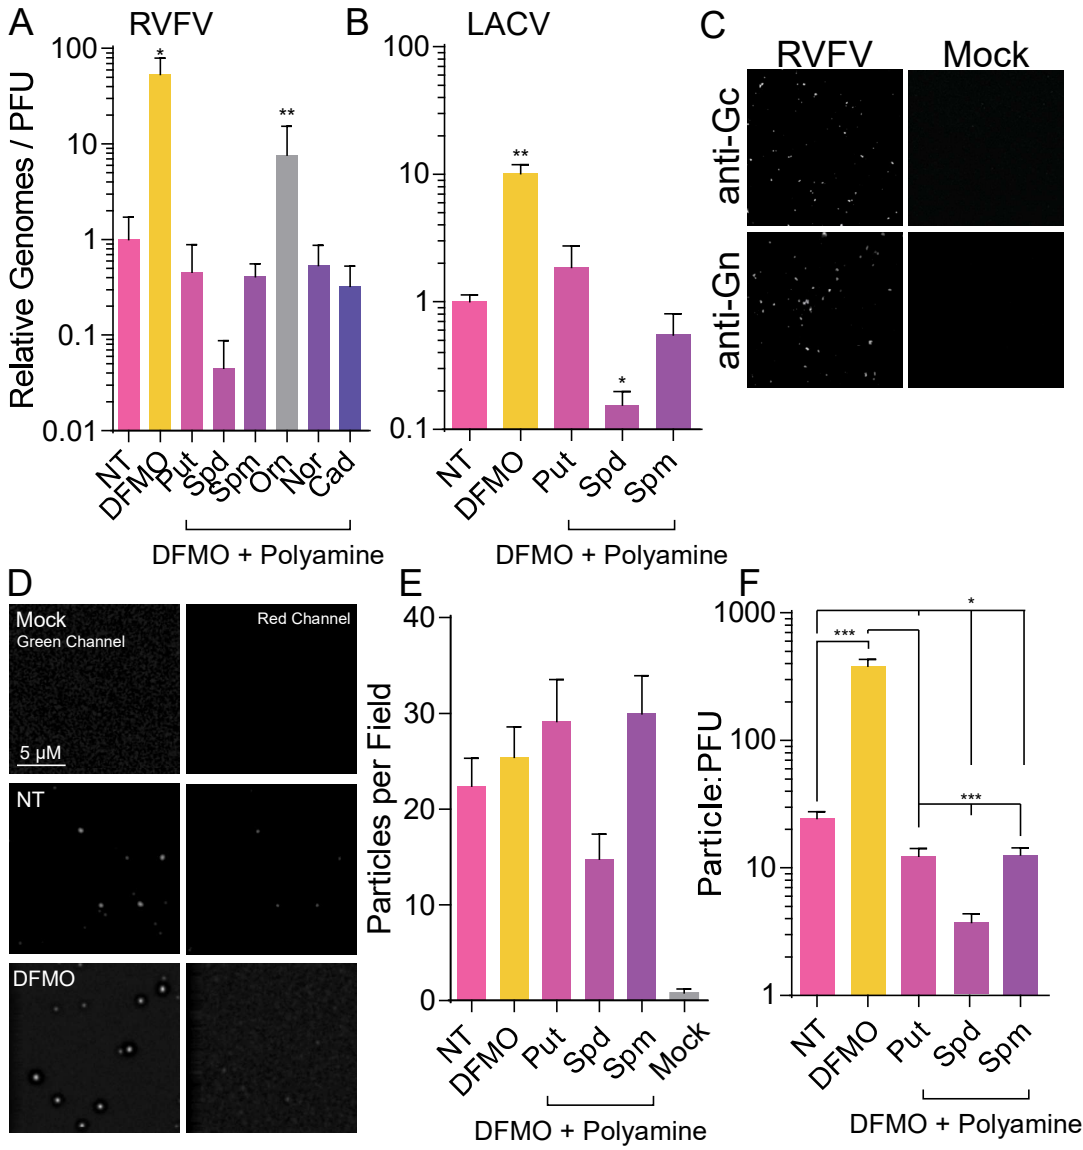



Figure 3. Polyamines associate with RVFV virions

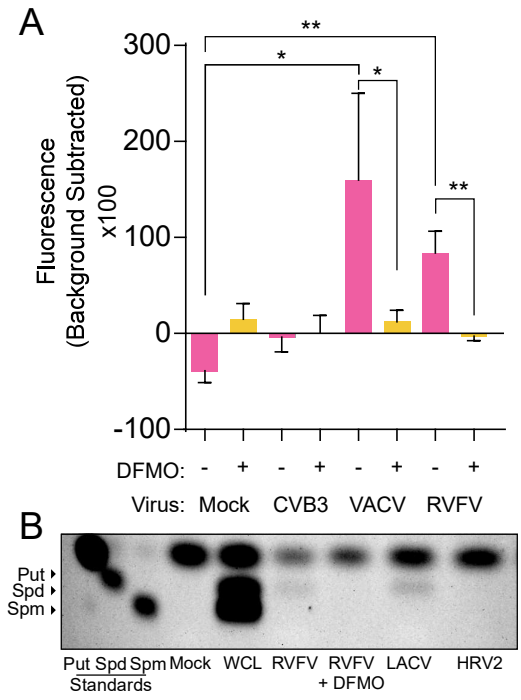

Figure 4. Polyamines interconvert upon replenishment of DFMO-treated cells.

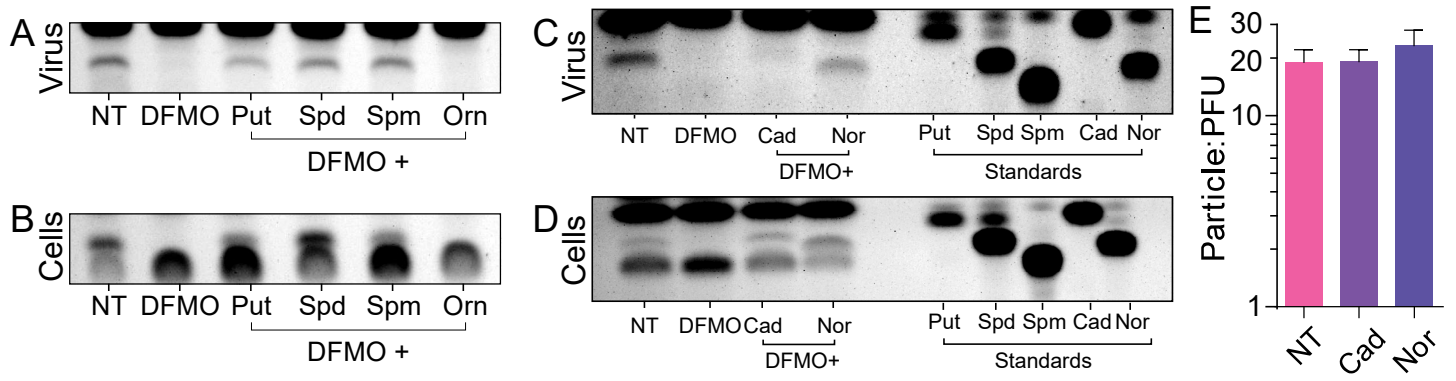

Figure 5. Non-interconvertible polyamine enhance virus replication in DFMO-treated cells.

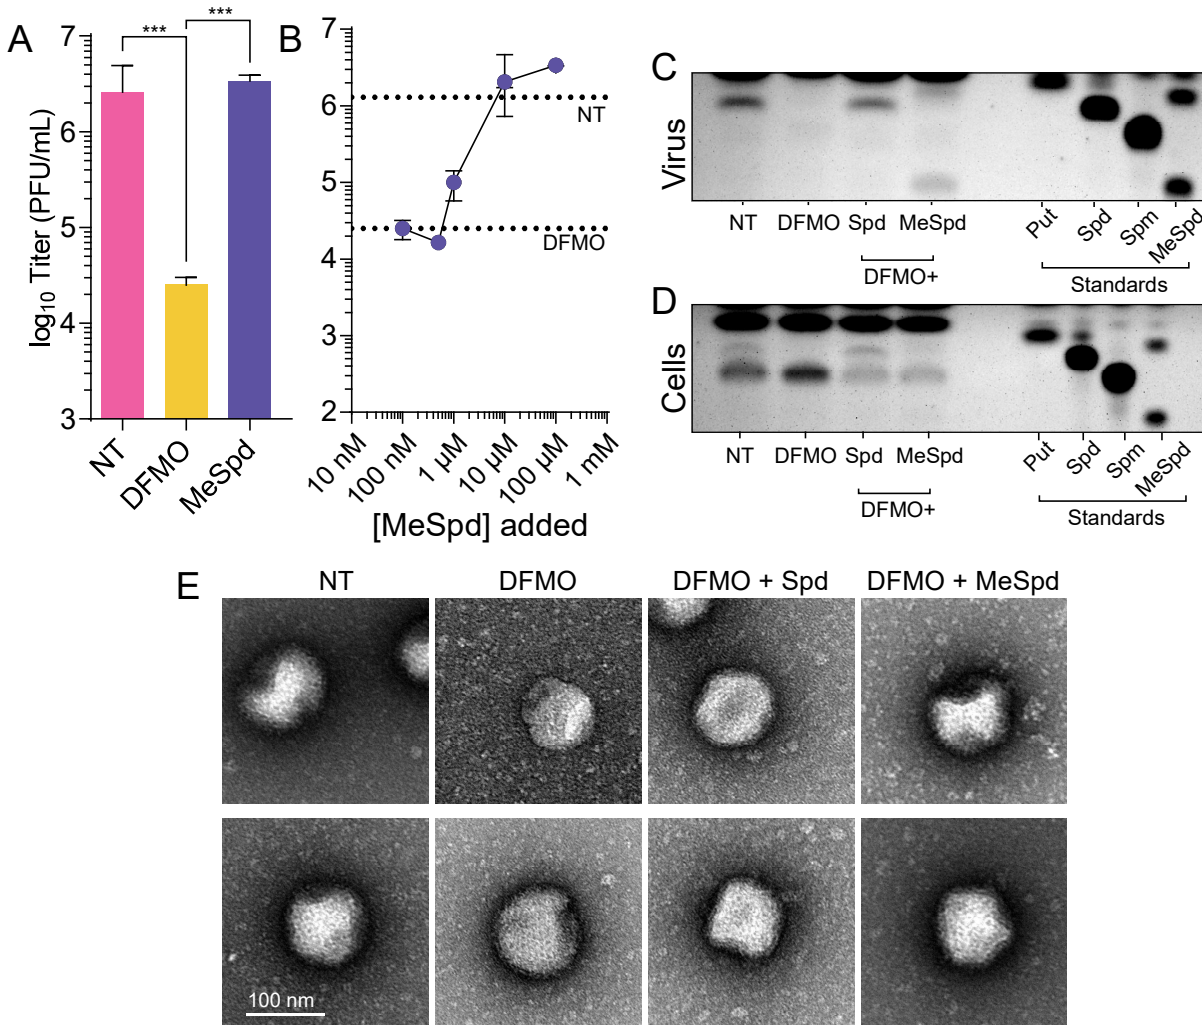

Figure 6. Polyamines are introduced to target cells upon infection.

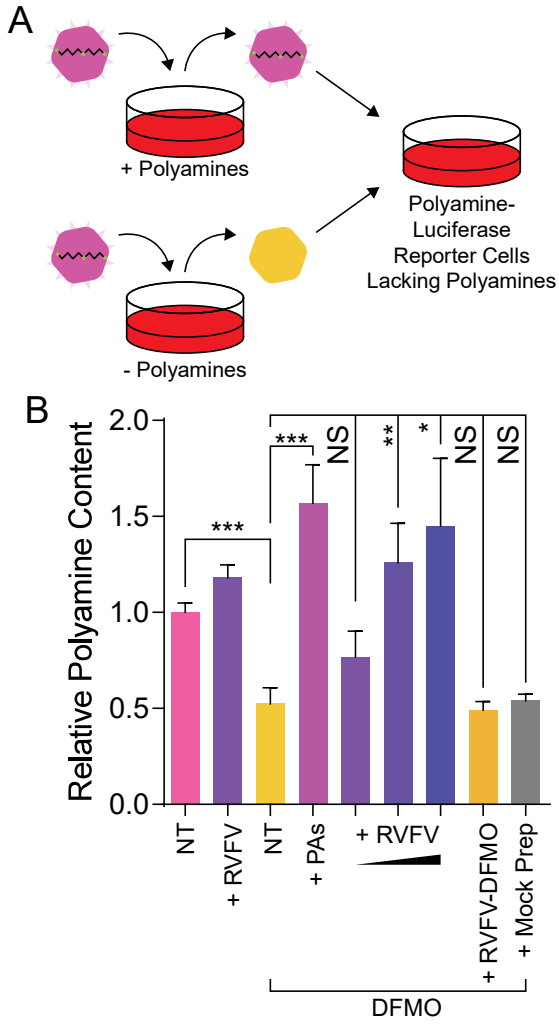

Figure 7. Polyamines maintain infectivity of bunyavirus particles.

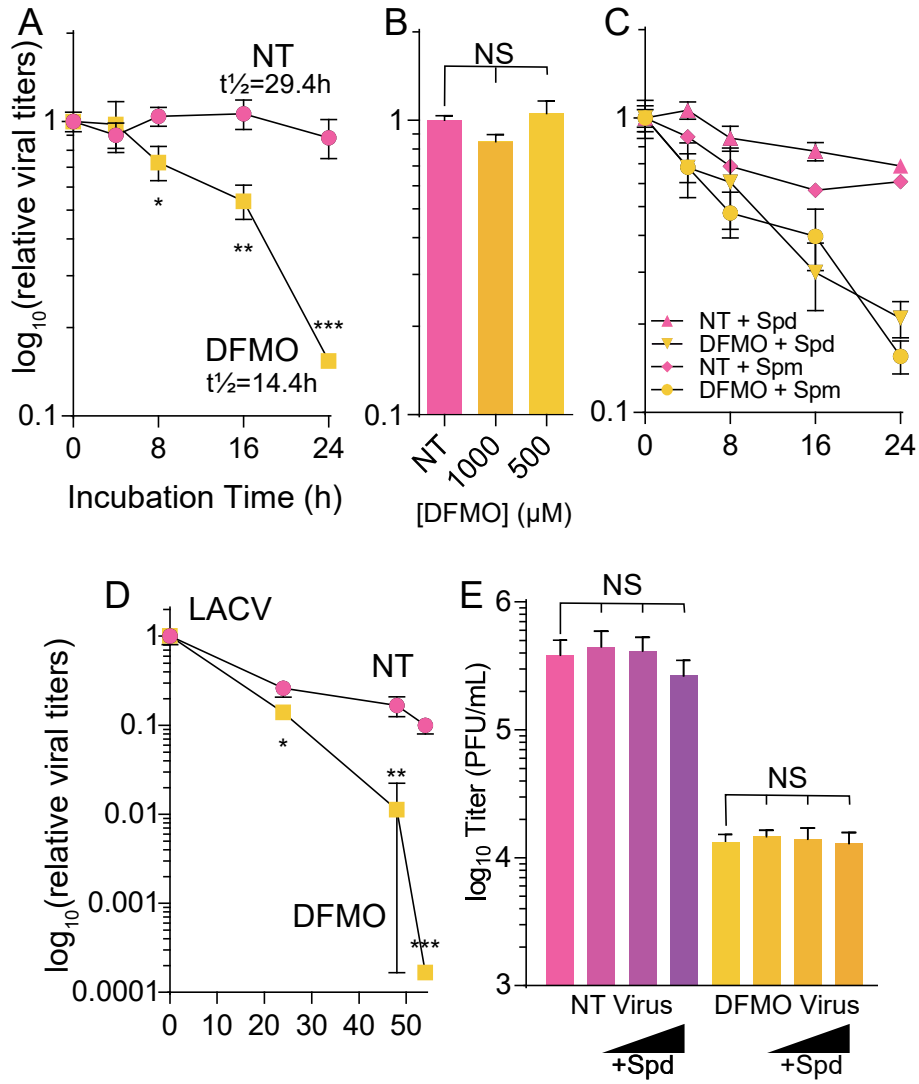

Source: https://www.biorxiv.org/content/10.1101/2020.01.23.915900v1.full.pdf
